# Supplementary material
Source: PubMed Central journal article supplement (PMC1735992)
Supplement: jmedgene_42_2_132__1.pdf [file jmedgene_42_2_132__1.pdf]

**Table A** Position, heterozygosity and effective sample size for all markers used in this analysis.

| Chromosome | Marker     | Position | Heterozygosity <sup>†</sup> | ESS <sup>‡</sup> |
|------------|------------|----------|-----------------------------|------------------|
| 1          | D1S468     | 4        | 0.73                        | 44.47            |
| 1          | D1S228     | 24.02    | 0.76                        | 48.94            |
| 1          | D1S199     | 37.3     | 0.85                        | 63.37            |
| 1          | D1S470     | 48.36    | 0.76                        | 55.33            |
| 1          | D1S255     | 58.66    | 0.79                        | 40.00            |
| 1          | D1S197     | 72.05    | 0.79                        | 56.84            |
| 1          | D1S209     | 87.51    | 0.78                        | 49.00            |
| 1          | D1S216     | 102.44   | 0.87                        | 43.97            |
| 1          | D1S207     | 107.16   | 0.87                        | 64.43            |
| 1          | D1S252     | 139.16   | 0.81                        | 44.91            |
| 1          | D1S305     | 147.34   | 0.79                        | 56.78            |
| 1          | D1S484     | 157.51   | 0.72                        | 35.23            |
| 1          | D1S196     | 169.4    | 0.68                        | 70.96            |
| 1          | D1S218     | 176.3    | 0.77                        | 82.87            |
| 1          | D1S191     | 186.76   | 0.76                        | 88.94            |
| 1          | D1S238     | 188.55   | 0.86                        | 107.96           |
| 1          | D1S2757    | 193.41   | 0.85                        | 98.59            |
| 1          | D1S413     | 194.98   | 0.74                        | 61.94            |
| 1          | D1S249     | 207.07   | 0.87                        | 123.37           |
| 1          | D1S229     | 222.29   | 0.73                        | 80.07            |
| 1          | D1S103     | 234.18   | 0.79                        | 54.45            |
| 2          | D2S281     | 15.19    | 0.79                        | 55.02            |
| 2          | D2S131     | 23.48    | 0.83                        | 62.19            |
| 2          | D2S165     | 42.25    | 0.85                        | 53.92            |
| 2          | D2S134     | 89.29    | 0.80                        | 97.32            |
| 2          | D2S2110    | 97.20    | 0.80                        | 141.41           |
| 2          | D2S1351    | 99.70    | 0.71                        | 117.14           |
| 2          | D2S139     | 103.88   | 0.83                        | 126.15           |
| 2          | D2S113     | 114.63   | 0.85                        | 110.45           |
| 2          | D2S160     | 124.94   | 0.77                        | 125.10           |
| 2          | D2S112     | 133.42   | 0.78                        | 88.67            |
| 2          | D2S151     | 157.50   | 0.79                        | 127.85           |
| 2          | D2S142     | 165.19   | 0.75                        | 118.91           |
| 2          | D2S2370    | 167.40   | 0.79                        | 127.42           |
| 2          | D2S382     | 171.00   | 0.83                        | 94.33            |
| 2          | D2S1776    | 174.19   | 0.75                        | 120.49           |
| 2          | D2S2302    | 177.97   | 0.83                        | 138.06           |
| 2          | D2S2188    | 181.53   | 0.76                        | 116.48           |
| 2          | D2S2314    | 183.07   | 0.86                        | 148.67           |
| 2          | D2S2310    | 186.57   | 0.77                        | 120.30           |
| 2          | D2S152     | 189.76   | 0.83                        | 140.86           |
| 2          | NAB6460_2  | 191.20   | 0.76                        | 116.07           |
| 2          | D2S309     | 198.66   | 0.83                        | 147.29           |
| 2          | D2S115     | 203.27   | 0.73                        | 107.29           |
| 2          | CREB1_3434 | 204.59   | 0.84                        | 122.15           |
| 2          | D2S157     | 208.37   | 0.81                        | 54.56            |
| 2          | D2S126     | 223.35   | 0.82                        | 92.24            |
| 2          | D2S159     | 230.48   | 0.78                        | 95.65            |
| 2          | D2S206     | 240.03   | 0.78                        | 96.21            |
| 2          | D2S125     | 258.19   | 0.83                        | 106.88           |
| 3          | D3S1297    | 4.95     | 0.82                        | 45.27            |
| 3          | D3S1560    | 12.7     | 0.81                        | 61.56            |
| 3          | D3S1263    | 29.62    | 0.86                        | 122.76           |
| 3          | D3S1298    | 63.06    | 0.87                        | 132.87           |
| 3          | D3S1289    | 73.73    | 0.83                        | 51.62            |
| 3          | D3S1300    | 82.22    | 0.82                        | 58.54            |

|   |         |        |      |        |
|---|---------|--------|------|--------|
| 3 | D3S1285 | 89.28  | 0.71 | 56.61  |
| 3 | D3S1271 | 112.28 | 0.72 | 52.48  |
| 3 | D3S1278 | 122.74 | 0.89 | 78.58  |
| 3 | D3S1303 | 126.07 | 0.78 | 69.91  |
| 3 | D3S3636 | 132.34 | 0.87 | 78.99  |
| 3 | D3S1576 | 144.46 | 0.7  | 46.78  |
| 3 | D3S1279 | 160.19 | 0.82 | 65.96  |
| 3 | D3S1282 | 170.46 | 0.68 | 68.84  |
| 3 | D3S1262 | 194.33 | 0.8  | 126.48 |
| 3 | D3S1314 | 204.48 | 0.88 | 62.39  |
| 3 | D3S1265 | 217.6  | 0.86 | 60.69  |
| 4 | D4S2936 | 0.89   | 0.82 | 101.50 |
| 4 | D4S412  | 4.42   | 0.79 | 71.43  |
| 4 | D4S431  | 12.46  | 0.71 | 46.34  |
| 4 | D4S1582 | 23.06  | 0.77 | 98.69  |
| 4 | D4S403  | 26.71  | 0.75 | 66.98  |
| 4 | D4S1546 | 36.99  | 0.77 | 91.77  |
| 4 | D4S418  | 49.58  | 0.77 | 101.88 |
| 4 | D4S405  | 60.23  | 0.73 | 69.69  |
| 4 | D4S398  | 75.67  | 0.81 | 55.01  |
| 4 | D4S1538 | 91.86  | 0.7  | 44.14  |
| 4 | D4S231  | 92.39  | 0.71 | 42.51  |
| 4 | D4S250  | 105.41 | 0.81 | 65.96  |
| 4 | D4S406  | 114.74 | 0.74 | 66.98  |
| 4 | D4S430  | 125.09 | 0.82 | 57.41  |
| 4 | D4S1565 | 141.07 | 0.77 | 59.54  |
| 4 | D4S413  | 155.42 | 0.82 | 69.28  |
| 4 | D4S415  | 173.24 | 0.79 | 48.86  |
| 4 | D4S408  | 189.37 | 0.77 | 24.39  |
| 4 | D4S426  | 202.69 | 0.81 | 44.48  |
| 5 | D5S432  | 27.94  | 0.59 | 34.07  |
| 5 | D5S416  | 37.1   | 0.79 | 18.28  |
| 5 | D5S268  | 38.16  | 0.78 | 51.54  |
| 5 | D5S419  | 46.2   | 0.83 | 64.97  |
| 5 | D5S426  | 56.81  | 0.72 | 50.07  |
| 5 | D5S407  | 75.66  | 0.86 | 67.36  |
| 5 | D5S428  | 101.88 | 0.75 | 50.01  |
| 5 | D5S409  | 112.14 | 0.54 | 25.47  |
| 5 | D5S421  | 118.78 | 0.82 | 60.39  |
| 5 | D5S2098 | 128.37 | 0.87 | 70.18  |
| 5 | D5S210  | 146.56 | 0.79 | 61.13  |
| 5 | D5S2090 | 150.03 | 0.8  | 62.74  |
| 5 | D5S410  | 158.44 | 0.77 | 62.17  |
| 5 | D5S422  | 169.53 | 0.81 | 56.38  |
| 5 | D5S400  | 177.01 | 0.86 | 62.02  |
| 5 | D5S429  | 184.28 | 0.79 | 51.58  |
| 5 | D5S408  | 205.05 | 0.78 | 56.74  |
| 6 | D6S1600 | 0.45   | 0.8  | 49.85  |
| 6 | D6S344  | 4.55   | 0.69 | 10.25  |
| 6 | D6S477  | 15.32  | 0.83 | 65.27  |
| 6 | D6S277  | 20.86  | 0.82 | 53.96  |
| 6 | D6S296  | 23.11  | 0.85 | 63.57  |
| 6 | D6S470  | 23.75  | 0.83 | 58.37  |
| 6 | D6S259  | 33.27  | 0.76 | 20.99  |
| 6 | D6S260  | 34.58  | 0.9  | 27.89  |
| 6 | D6S274  | 37.2   | 0.84 | 21.00  |
| 6 | D6S285  | 40.04  | 0.71 | 41.89  |
| 6 | D6S422  | 42.83  | 0.76 | 49.72  |
| 6 | D6S276  | 47.93  | 0.75 | 43.07  |
| 6 | D6S105  | 50.89  | 0.79 | 70.37  |
| 6 | TNFA    | 52.95  | 0.82 | 58.82  |
| 6 | D6S291  | 55.51  | 0.73 | 52.53  |

|   |         |        |      |        |
|---|---------|--------|------|--------|
| 6 | D6S286  | 90.11  | 0.82 | 64.90  |
| 6 | D6S300  | 100.7  | 0.79 | 59.05  |
| 6 | D6S268  | 111.73 | 0.74 | 44.73  |
| 6 | D6S287  | 119.55 | 0.76 | 52.30  |
| 6 | D6S262  | 130.73 | 0.81 | 53.69  |
| 6 | D6S270  | 134.92 | 0.73 | 47.35  |
| 6 | D6S314  | 143.08 | 0.79 | 57.21  |
| 6 | D6S308  | 144.97 | 0.69 | 43.01  |
| 6 | D6S290  | 159.2  | 0.69 | 41.60  |
| 6 | D6S305  | 176.89 | 0.86 | 56.55  |
| 6 | D6S264  | 183.77 | 0.73 | 40.02  |
| 6 | D6S281  | 188.38 | 0.68 | 31.12  |
| 7 | D7S531  | 7.52   | 0.76 | 44.71  |
| 7 | D7S513  | 22.62  | 0.85 | 60.72  |
| 7 | D7S493  | 36.92  | 0.87 | 58.43  |
| 7 | D7S629  | 39.03  | 0.75 | 49.99  |
| 7 | D7S484  | 54.65  | 0.7  | 49.13  |
| 7 | D7S519  | 68.66  | 0.81 | 55.55  |
| 7 | D7S502  | 80.92  | 0.86 | 63.71  |
| 7 | D7S669  | 89.39  | 0.79 | 57.21  |
| 7 | D7S524  | 98.28  | 0.77 | 101.79 |
| 7 | D7S2430 | 103.94 | 0.74 | 130.06 |
| 7 | D7S527  | 106.3  | 0.83 | 123.92 |
| 7 | D7S477  | 110.6  | 0.74 | 97.11  |
| 7 | D7S2453 | 115.61 | 0.74 | 102.84 |
| 7 | D7S2459 | 117.72 | 0.79 | 130.79 |
| 7 | D7S486  | 122.44 | 0.78 | 113.25 |
| 7 | CFTR    | 123.57 | 0.7  | 102.73 |
| 7 | D7S480  | 124.42 | 0.88 | 154.95 |
| 7 | D7S530  | 130.7  | 0.76 | 117.21 |
| 7 | D7S640  | 138.75 | 0.87 | 158.90 |
| 7 | D7S500  | 139.77 | 0.88 | 150.79 |
| 7 | D7S684  | 146.7  | 0.83 | 138.91 |
| 7 | D7S2513 | 150.22 | 0.8  | 114.51 |
| 7 | D7S2511 | 154.43 | 0.81 | 125.88 |
| 7 | D7S483  | 166.91 | 0.89 | 138.27 |
| 7 | D7S550  | 179.51 | 0.79 | 53.50  |
| 8 | D8S504  | 0      | 0.75 | 54.95  |
| 8 | D8S264  | 3.36   | 0.85 | 82.36  |
| 8 | D8S503  | 21.9   | 0.75 | 49.48  |
| 8 | D8S552  | 23.58  | 0.79 | 68.54  |
| 8 | D8S549  | 26.31  | 0.5  | 45.86  |
| 8 | D8S261  | 30.15  | 0.81 | 75.21  |
| 8 | D8S258  | 34.88  | 0.71 | 67.72  |
| 8 | D8S1786 | 39.17  | 0.84 | 102.51 |
| 8 | D8S283  | 54.23  | 0.8  | 59.41  |
| 8 | D8S285  | 68.31  | 0.76 | 39.64  |
| 8 | D8S260  | 73.6   | 0.8  | 57.81  |
| 8 | D8S286  | 87.92  | 0.83 | 52.74  |
| 8 | D8S273  | 95.37  | 0.8  | 51.99  |
| 8 | D8S88   | 96.32  | 0.84 | 42.01  |
| 8 | D8S257  | 104.3  | 0.71 | 48.88  |
| 8 | D8S556  | 112.45 | 0.78 | 38.80  |
| 8 | D8S281  | 116.74 | 0.67 | 35.19  |
| 8 | D8S198  | 124.31 | 0.79 | 46.20  |
| 8 | D8S284  | 139.79 | 0.83 | 50.76  |
| 8 | D8S272  | 150.08 | 0.76 | 52.42  |
| 9 | D9S144  | 21.15  | 0.74 | 44.19  |
| 9 | D9S156  | 33.76  | 0.8  | 119.37 |
| 9 | D9S157  | 36.26  | 0.83 | 118.81 |
| 9 | D9S171  | 45.57  | 0.77 | 117.09 |
| 9 | D9S161  | 51.5   | 0.79 | 113.68 |

|    |          |        |      |        |
|----|----------|--------|------|--------|
| 9  | D9S43    | 54.06  | 0.77 | 38.39  |
| 9  | D9S147E  | 54.07  | 0.77 | 108.33 |
| 9  | D9S15    | 66.45  | 0.7  | 46.08  |
| 9  | D9S175   | 70.64  | 0.85 | 61.98  |
| 9  | D9S257   | 88.11  | 0.9  | 62.22  |
| 9  | D9S176   | 102.68 | 0.81 | 56.68  |
| 9  | D9S154   | 123.2  | 0.85 | 46.02  |
| 9  | D9S752   | 136.57 | 0.78 | 25.15  |
| 9  | D9S159   | 138.68 | 0.84 | 106.33 |
| 9  | D9S164   | 146.92 | 0.83 | 108.41 |
| 9  | D9S66    | 148.06 | 0.76 | 30.22  |
| 9  | D9S1107  | 155.32 | 0.93 | 33.25  |
| 9  | D9S67    | 156.78 | 0.75 | 18.45  |
| 9  | D9S1826  | 157.73 | 0.59 | 68.62  |
| 9  | D9S158   | 162.35 | 0.76 | 59.16  |
| 9  | D9S905   | 168.73 | 0.38 | 18.03  |
| 10 | D10S1745 | 5.85   | 0.84 | 60.61  |
| 10 | D10S189  | 19.78  | 0.68 | 101.35 |
| 10 | D10S1779 | 22.84  | 0.81 | 130.84 |
| 10 | D10S191  | 36.28  | 0.81 | 123.08 |
| 10 | D10S197  | 50.04  | 0.74 | 108.27 |
| 10 | D10S208  | 59.94  | 0.79 | 92.44  |
| 10 | D10S220  | 70.07  | 0.81 | 137.03 |
| 10 | D10S537  | 89.16  | 0.86 | 130.85 |
| 10 | D10S580  | 95.52  | 0.73 | 111.09 |
| 10 | D10S201  | 99.47  | 0.83 | 138.64 |
| 10 | D10S1765 | 107.92 | 0.87 | 148.83 |
| 10 | D10S192  | 120.75 | 0.81 | 64.60  |
| 10 | D10S190  | 140.05 | 0.76 | 55.37  |
| 10 | D10S217  | 159.85 | 0.68 | 52.91  |
| 11 | D11S922  | 0.06   | 0.92 | 50.33  |
| 11 | D11S569  | 19.07  | 0.79 | 55.07  |
| 11 | D11S899  | 29.35  | 0.76 | 46.67  |
| 11 | D11S904  | 43.64  | 0.82 | 73.35  |
| 11 | D11S907  | 51     | 0.7  | 51.14  |
| 11 | D11S903  | 59.83  | 0.75 | 47.37  |
| 11 | INT2     | 77.79  | 0.77 | 41.37  |
| 11 | D11S916  | 80.39  | 0.84 | 61.42  |
| 11 | D11S901  | 88.48  | 0.82 | 54.05  |
| 11 | D11S35   | 107.74 | 0.8  | 55.46  |
| 11 | D11S927  | 116.93 | 0.86 | 67.05  |
| 11 | D11S925  | 127.75 | 0.81 | 41.68  |
| 11 | D11S934  | 133.07 | 0.83 | 39.61  |
| 11 | D11S910  | 146.24 | 0.78 | 53.22  |
| 11 | D11S968  | 152.45 | 0.78 | 45.78  |
| 12 | D12S99   | 15.2   | 0.84 | 46.89  |
| 12 | D12S77   | 24.85  | 0.89 | 60.46  |
| 12 | D12S358  | 28.99  | 0.74 | 46.89  |
| 12 | D12S364  | 31.16  | 0.75 | 59.43  |
| 12 | D12S87   | 53.32  | 0.78 | 46.84  |
| 12 | D12S368  | 66.55  | 0.83 | 64.85  |
| 12 | D12S83   | 74.03  | 0.79 | 50.22  |
| 12 | D12S43   | 83.24  | 0.77 | 51.70  |
| 12 | D12S92   | 87.2   | 0.78 | 50.45  |
| 12 | D12S95   | 102.37 | 0.81 | 56.29  |
| 12 | D12S338  | 116.46 | 0.77 | 55.09  |
| 12 | D12S366  | 137.36 | 0.71 | 41.45  |
| 12 | D12S342  | 145.79 | 0.74 | 57.71  |
| 12 | D12S97   | 164.3  | 0.67 | 43.12  |
| 13 | D13S221  | 16.26  | 0.84 | 59.26  |
| 13 | D13S192  | 18.36  | 0.91 | 57.40  |
| 13 | D13S120  | 22.8   | 0.73 | 52.83  |

|    |           |        |      |        |
|----|-----------|--------|------|--------|
| 13 | D13S218   | 39.34  | 0.67 | 42.84  |
| 13 | D13S153   | 51.63  | 0.88 | 149.89 |
| 13 | D13S279   | 64.21  | 0.78 | 131.80 |
| 13 | D13S800   | 67.77  | 0.76 | 55.23  |
| 13 | D13S170   | 76.17  | 0.88 | 126.50 |
| 13 | D13S193   | 86.26  | 0.73 | 92.74  |
| 13 | D13S122   | 88.75  | 0.81 | 103.13 |
| 13 | D13S280   | 98.48  | 0.89 | 68.56  |
| 13 | D13S158   | 98.96  | 0.82 | 63.97  |
| 13 | D13S173   | 109.36 | 0.76 | 53.19  |
| 13 | D13S285   | 123.78 | 0.82 | 61.61  |
| 14 | D14S72    | 9.35   | 0.79 | 68.33  |
| 14 | D14S50    | 13.41  | 0.78 | 60.90  |
| 14 | D14S64    | 18.97  | 0.78 | 99.68  |
| 14 | D14S80    | 24.21  | 0.81 | 96.00  |
| 14 | D14S1034  | 29.69  | 0.75 | 95.70  |
| 14 | D14S49    | 34.32  | 0.84 | 105.31 |
| 14 | D14S70    | 36.37  | 0.76 | 86.00  |
| 14 | D14S75    | 38.7   | 0.81 | 102.56 |
| 14 | D14S1013  | 44     | 0.88 | 104.97 |
| 14 | D14S276   | 54.96  | 0.75 | 57.00  |
| 14 | D14S63    | 63.5   | 0.68 | 59.35  |
| 14 | D14S1025  | 75.86  | 0.74 | 54.45  |
| 14 | D14S74    | 81.55  | 0.77 | 55.51  |
| 14 | D14S1035  | 87.85  | 0.78 | 56.26  |
| 14 | D14S68    | 94.4   | 0.73 | 67.37  |
| 14 | D14S995   | 98.2   | 0.83 | 55.49  |
| 14 | D14S51    | 105.92 | 0.82 | 69.99  |
| 14 | D14S267   | 108.06 | 0.9  | 76.45  |
| 15 | D15S128   | 5.82   | 0.81 | 89.03  |
| 15 | D15S122   | 7.16   | 0.77 | 45.70  |
| 15 | GABRB3    | 11.07  | 0.77 | 49.08  |
| 15 | D15S97    | 11.08  | 0.83 | 65.26  |
| 15 | GABR155CA | 11.76  | 0.81 | 50.31  |
| 15 | D15S156   | 15.05  | 0.57 | 31.41  |
| 15 | D15S219   | 15.06  | 0.48 | 71.92  |
| 15 | D15S1010  | 26.15  | 0.78 | 72.37  |
| 15 | D15S118   | 34.1   | 0.77 | 96.57  |
| 15 | D15S129   | 42.47  | 0.84 | 92.75  |
| 15 | CYP19     | 49.66  | 0.73 | 72.40  |
| 15 | D15S117   | 56.46  | 0.82 | 124.07 |
| 15 | D15S125   | 68.72  | 0.77 | 118.06 |
| 15 | D15S114   | 80.36  | 0.65 | 68.53  |
| 15 | D15S127   | 97.26  | 0.85 | 97.63  |
| 15 | D15S1004  | 107.1  | 0.75 | 92.92  |
| 15 | D15S207   | 115.06 | 0.82 | 84.02  |
| 15 | D15S107   | 121.07 | 0.68 | 65.77  |
| 16 | D16S283   | 2.45   | 0.65 | 96.71  |
| 16 | D16S423   | 14.05  | 0.76 | 81.19  |
| 16 | D16S418   | 19.59  | 0.86 | 116.37 |
| 16 | D16S407   | 25.24  | 0.87 | 144.25 |
| 16 | D16S497   | 28.3   | 0.83 | 115.31 |
| 16 | D16S3102  | 29.63  | 0.7  | 88.99  |
| 16 | D16S405   | 33.42  | 0.79 | 102.14 |
| 16 | D16S3103  | 37.97  | 0.81 | 58.29  |
| 16 | D16S420   | 47.57  | 0.77 | 76.26  |
| 16 | D16S3131  | 50.49  | 0.87 | 29.56  |
| 16 | D16S261   | 58.93  | 0.68 | 93.78  |
| 16 | D16S3034  | 66.13  | 0.66 | 18.32  |
| 16 | D16S320   | 74.49  | 0.84 | 103.01 |
| 16 | D16S514   | 81.16  | 0.85 | 39.42  |
| 16 | D16S3095  | 86.16  | 0.73 | 31.79  |

|    |          |        |      |        |
|----|----------|--------|------|--------|
| 16 | D16S515  | 92.06  | 0.84 | 58.29  |
| 16 | D16S289  | 96.27  | 0.72 | 48.49  |
| 16 | D16S516  | 102.36 | 0.73 | 47.92  |
| 16 | D16S422  | 106.28 | 0.84 | 59.60  |
| 16 | D16S520  | 122.84 | 0.83 | 28.86  |
| 17 | D17S513  | 16.22  | 0.71 | 47.69  |
| 17 | D17S786  | 23.36  | 0.78 | 68.11  |
| 17 | D17S799  | 37     | 0.87 | 84.34  |
| 17 | D17S953  | 46.19  | 0.68 | 72.87  |
| 17 | D17S1873 | 52.3   | 0.89 | 140.05 |
| 17 | D17S841  | 52.38  | 0.65 | 78.57  |
| 17 | HTTTPR   | 53.23  | 0.49 | 39.16  |
| 17 | D17S798  | 55.6   | 0.76 | 115.39 |
| 17 | D17S250  | 67.63  | 0.85 | 146.69 |
| 17 | D17S934  | 72.69  | 0.86 | 157.49 |
| 17 | HOX2B    | 74.33  | 0.61 | 71.88  |
| 17 | D17S787  | 81.32  | 0.79 | 109.40 |
| 17 | D17S807  | 96.39  | 0.86 | 145.84 |
| 17 | D17S789  | 99.5   | 0.81 | 143.78 |
| 17 | D17S949  | 102.96 | 0.84 | 123.48 |
| 17 | D17S939  | 118.11 | 0.85 | 67.49  |
| 17 | D17S784  | 129.62 | 0.81 | 82.53  |
| 18 | D18S59   | 1.39   | 0.83 | 63.50  |
| 18 | D18S62   | 17.62  | 0.69 | 50.20  |
| 18 | D18S53   | 37.67  | 0.81 | 60.42  |
| 18 | D18S71   | 39.52  | 0.84 | 63.62  |
| 18 | D18S57   | 57.5   | 0.86 | 60.61  |
| 18 | D18S64   | 85.2   | 0.72 | 46.77  |
| 18 | D18S61   | 97.11  | 0.84 | 60.35  |
| 19 | D19S247  | 9.95   | 0.8  | 68.02  |
| 19 | D19S901B | 24.07  | 0.72 | 48.87  |
| 19 | D19S221  | 32.39  | 0.85 | 105.43 |
| 19 | D19S226  | 36.35  | 0.84 | 86.56  |
| 19 | D19S49   | 55.64  | 0.77 | 95.83  |
| 19 | D19S225  | 58.25  | 0.78 | 100.37 |
| 19 | D19S220  | 63.58  | 0.87 | 108.69 |
| 19 | D19S420  | 68.94  | 0.81 | 61.45  |
| 19 | D19S217  | 70.53  | 0.76 | 55.15  |
| 19 | D19S412  | 74.65  | 0.82 | 61.89  |
| 19 | D19S606  | 75.6   | 0.77 | 55.86  |
| 19 | D19S867  | 82.03  | 0.82 | 58.98  |
| 19 | D19S180  | 94.56  | 0.76 | 54.51  |
| 20 | D20S199  | 5.81   | 0.87 | 57.06  |
| 20 | D20S186  | 34.58  | 0.83 | 60.22  |
| 20 | D20S112  | 44.35  | 0.81 | 50.91  |
| 20 | D20S200  | 55.63  | 0.75 | 39.68  |
| 20 | D20S106  | 57.59  | 0.7  | 17.83  |
| 20 | D20S107  | 61.78  | 0.8  | 50.43  |
| 20 | D20S120  | 89.28  | 0.84 | 57.04  |
| 20 | D20S171  | 98.63  | 0.82 | 45.69  |
| 20 | D20S93   | 102    | 0.91 | 73.41  |
| 21 | D21S258  | 4.57   | 0.85 | 42.88  |
| 21 | D21S120  | 5.23   | 0.75 | 42.42  |
| 21 | D21S172  | 7.36   | 0.7  | 42.86  |
| 21 | D21S265  | 25.46  | 0.81 | 58.88  |
| 21 | D21S219  | 38.95  | 0.73 | 38.96  |
| 21 | D21S65   | 40.61  | 0.85 | 46.43  |
| 21 | D21S268  | 43.71  | 0.9  | 49.39  |
| 21 | D21S167  | 44.6   | 0.67 | 36.95  |
| 21 | D21S270  | 45.14  | 0.87 | 73.35  |
| 21 | D21S1889 | 46.73  | 0.87 | 64.35  |
| 21 | D21S49   | 51.71  | 0.67 | 18.73  |

|    |         |        |      |        |
|----|---------|--------|------|--------|
| 22 | D22S420 | 2.96   | 0.73 | 83.11  |
| 22 | D22S264 | 9.52   | 0.85 | 109.50 |
| 22 | D22S311 | 10.45  | 0.77 | 84.85  |
| 22 | D22S446 | 12.38  | 0.79 | 82.99  |
| 22 | D22S156 | 18.96  | 0.69 | 76.28  |
| 22 | D22S315 | 21.4   | 0.74 | 66.99  |
| 22 | D22S280 | 37.03  | 0.82 | 106.75 |
| 22 | D22S283 | 42.68  | 0.9  | 48.86  |
| 22 | CYP2D   | 51.99  | 0.62 | 42.22  |
| 22 | D22S274 | 56.47  | 0.78 | 50.19  |
| 23 | DXS996  | 12.71  | 0.82 | NA     |
| 23 | DXS8051 | 18     | 0.88 | NA     |
| 23 | DXS207  | 27.05  | 0.87 | NA     |
| 23 | DXS1053 | 27.26  | 0.75 | NA     |
| 23 | COS17   | 28.03  | 0.43 | NA     |
| 23 | DXS43   | 28.25  | 0.6  | NA     |
| 23 | DXS999  | 31.92  | 0.71 | NA     |
| 23 | DXS451  | 37.66  | 0.74 | NA     |
| 23 | DXS1061 | 43.24  | 0.68 | NA     |
| 23 | DXS538  | 52.3   | 0.77 | NA     |
| 23 | MAOB    | 64.09  | 0.77 | NA     |
| 23 | DXS1003 | 67.81  | 0.86 | NA     |
| 23 | DXS991  | 79.2   | 0.81 | NA     |
| 23 | DXS990  | 94.92  | 0.72 | NA     |
| 23 | DXS178  | 102.24 | 0.76 | NA     |
| 23 | DXS1001 | 120.35 | 0.8  | NA     |
| 23 | DXS1047 | 132.12 | 0.81 | NA     |
| 23 | DXS984  | 145.8  | 0.72 | NA     |
| 23 | DXS1227 | 150.37 | 0.61 | NA     |
| 23 | DXS998  | 165.82 | 0.6  | NA     |

\*Estimated sex averaged position from pter in cM; †estimated marker heterozygosity and effective sample size as determined by SPLINK. ND, not determined. Primer sequences are available from the authors on request
